# Supplementary material for: Systematic pan-cancer landscape identifies CARM1 as a potential prognostic and immunological biomarker
Source: Springer Nature journal article supplement (doi:10.1186/s12863-021-01022-w), 2022-01-16
Supplement: MOESM3 [file 12863_2021_1022_MOESM3_ESM.pdf]

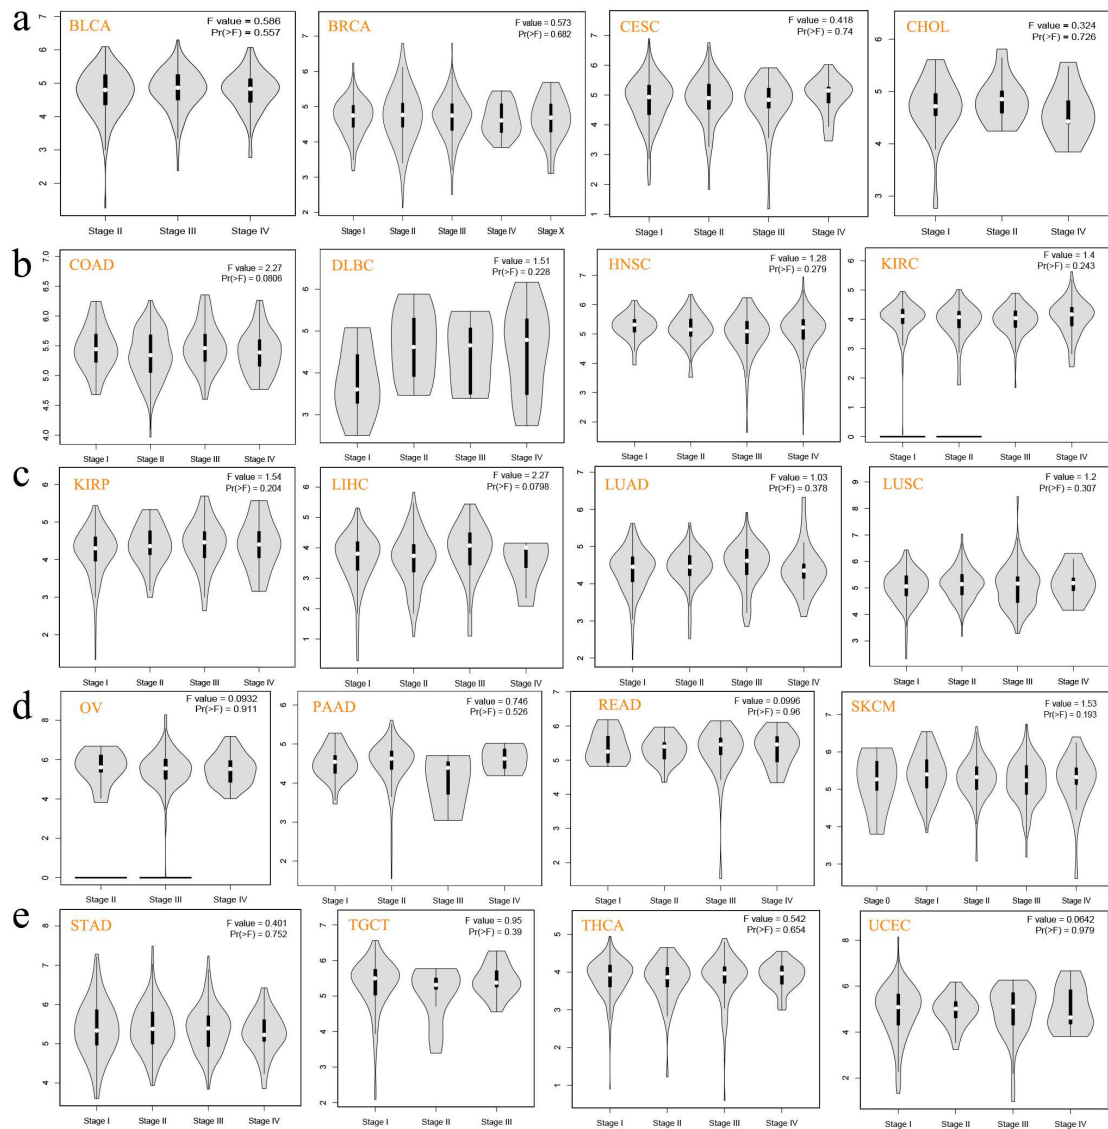

**Fig. S3.** Expression levels of the CARM1 gene by different pathological stages of (a) BLCA, BRCA, CESC, CHOL; (b) COAD, DLBC, HNSC, KIRC; (c) KIRP, LIHC, LUAD, LUSC; (d) OV, PAAD, READ, SKCM; (e) STAD, TGCT, THCA, UCEC.
