# Supplementary material for: Systematic pan-cancer landscape identifies CARM1 as a potential prognostic and immunological biomarker
Source: Springer Nature journal article supplement (doi:10.1186/s12863-021-01022-w), 2022-01-16
Supplement: MOESM9 [file 12863_2021_1022_MOESM9_ESM.pdf]

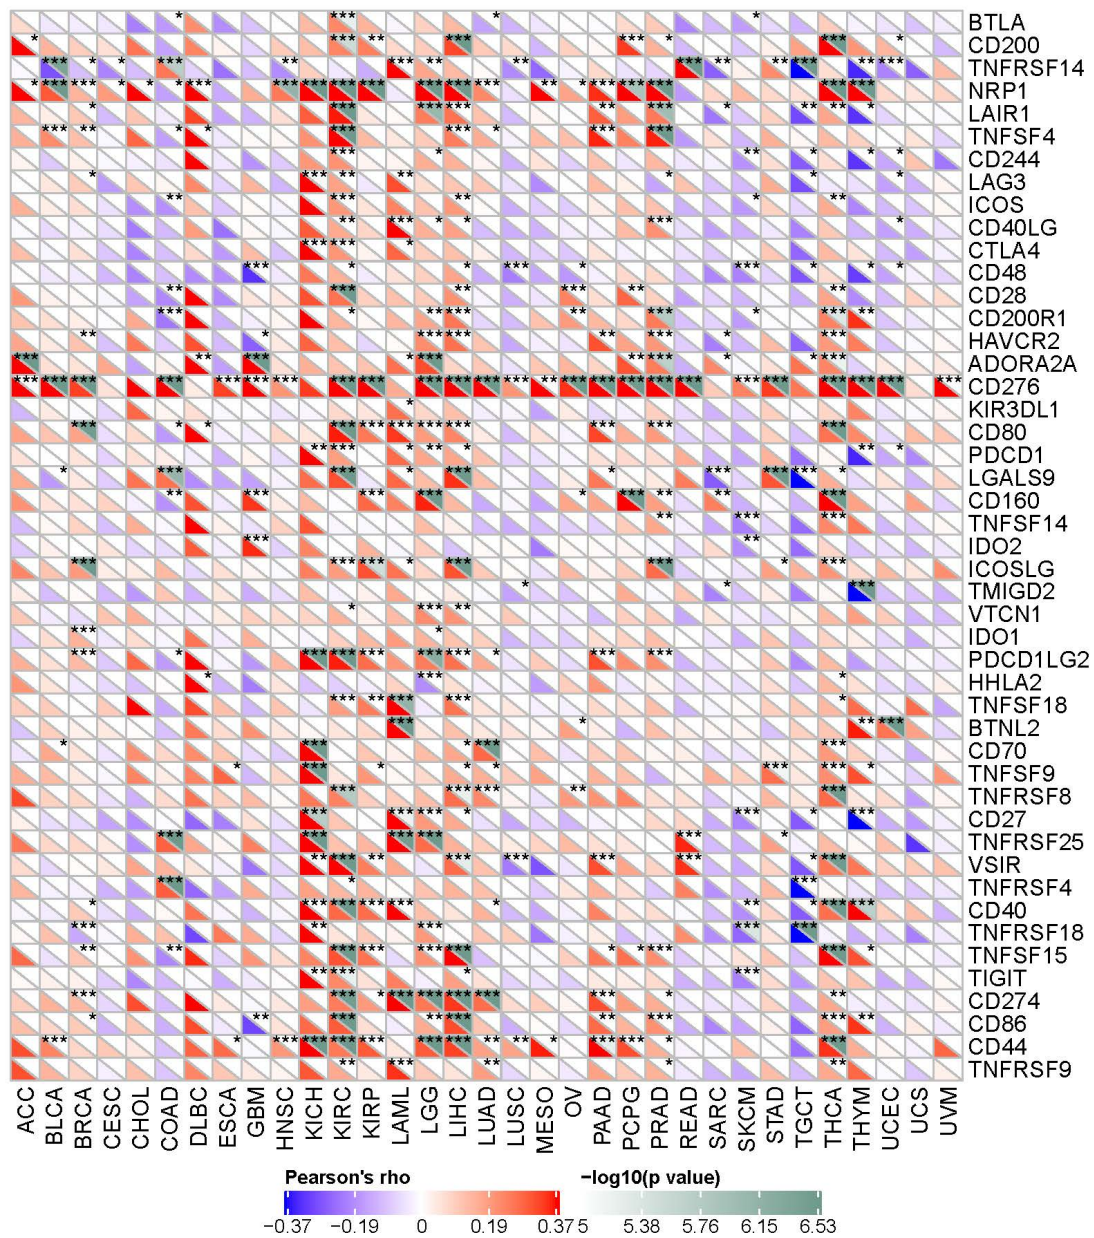

**Fig. S5. Correlation between CARM1 and some known immune checkpoints mRNA expression in various cancers from TCGA.** The lower triangle in each block represents the coefficient calculated by Pearson's correlation test, and the upper triangle represents log<sub>10</sub> transformed *P*-value. \* *P*<0.05, \*\* *P*<0.01, \*\*\* *P*<0.001.
