# Supplementary material for: Systematic pan-cancer landscape identifies CARM1 as a potential prognostic and immunological biomarker
Source: BMC Genom Data. 2022 Jan 16;23:7. doi: 10.1186/s12863-021-01022-w (PMC8761291; doi:10.1186/s12863-021-01022-w)
Supplement: Supplementary file 4 — Additional files 4: Table S1. Subgroup analysis on the correlation of CARM1 expression and prognosis of gastric cancer cases. [file 12863_2021_1022_MOESM4_ESM.xlsx]

## Sheet: Table 1
Table S1. Subgroup analysis on the correlation of CARM1 expression and prognosis of gastric cancer cases.
Factor	Subgroup	Sample size	OS		FP		PPS
			HR	P	HR	P	HR	P
stage	1	69	2.74	0.058	1.73	0.35	12.05	0.0038
	2	145	1.81	0.053	1.4	0.27	2.12	0.022
	3	319	2.47	2.2e-06	1.86	0.0015	3.51	1.7e-08
	4	152	1.74	0.0047	1.47	0.059	2.12	0.002
Stage T	1	14	/	/	/	/	/	/
	2	253	1.41	0.11	1.27	0.26	1.91	0.0038
	3	208	1.84	0.0013	1.46	0.036	2.96	3.2e-07
	4	39	1.64	0.25	0.68	0.34	2.58	0.06
Stage N	0	76	1.72	0.21	1.7	0.21	4.26	0.019
Stage M	0	459	1.76	0.00011	1.44	0.0095	2.53	3.5e-10
	1	58	1.73	0.063	1.42	0.24	2.01	0.058
Lauren classification	instestinal	336	2.26	2.8e-07	1.63	0.0092	3.75	4.2e-11
	diffuse	248	1.69	0.0028	1.5	0.021	1.78	0.0024
	mixed	33	2.57	0.072	0.54	0.22	/	/
differentiation	poorly	166	0.79	0.28	0.69	0.14	3.67	0.00035
	moderately	67	1.3	0.44	0.72	0.32	1.89	0.21
	well	32	0.64	0.3	/	/	/	/
