# Supplementary material for: Systematic pan-cancer landscape identifies CARM1 as a potential prognostic and immunological biomarker
Source: BMC Genom Data. 2022 Jan 16;23:7. doi: 10.1186/s12863-021-01022-w (PMC8761291; doi:10.1186/s12863-021-01022-w)
Supplement: Supplementary file 5 — Additional files 5: Table S2. Subgroup analysis on the correlation of CARM1 expression and prognosis of liver cancer cases. [file 12863_2021_1022_MOESM5_ESM.xlsx]

## Sheet: Table 1
Table S2. Subgroup analysis on the correlation of CARM1 expression and prognosis of liver cancer cases.
Factor	Subgroup	Sample size	OS		RFS		PFS		DSS
			HR	P	HR	P	HR	P	HR	P
Stage	1	171	1.32	0.38	0.5	0.011	0.56	0.02	0.65	0.35
Grade	1	55	0.55	0.21	1.82	0.24	2.11	0.069	0.28	0.032
AJCC-T	1	181	1.32	0.36	0.57	0.036	0.62	0.054	0.64	0.28
Vascular invasion	none	205	0.79	0.37	0.55	0.017	0.57	0.02	0.63	0.22
Gender	male	250	0.68	0.11	0.73	0.16	0.61	0.014	0.48	0.012
	female	121	1.41	0.24	0.63	0.12	1.34	0.29	1.89	0.074
Race	white	184	1.56	0.058	1.67	0.027	1.48	0.052	1.68	0.064
	Asian	158	0.61	0.096	0.54	0.016	0.5	0.0063	0.44	0.038
Sorafenib treatment	treated	30	2.22	0.15	2.16	0.12	2.41	0.033	2.13	0.17
Alcohol consumption	Yes	117	1.88	0.058	1.56	0.14	1.51	0.13	0.51	0.082
	None	205	0.65	0.062	0.66	0.06	0.63	0.022	0.52	0.036
Hepatitis virus	yes	153	0.42	0.0096	0.58	0.031	0.56	0.012	0.26	0.0021
	None	169	1.86	0.0085	1.69	0.05	1.53	0.069	1.89	0.032
