# Supplementary material for: Systematic pan-cancer landscape identifies CARM1 as a potential prognostic and immunological biomarker
Source: BMC Genom Data. 2022 Jan 16;23:7. doi: 10.1186/s12863-021-01022-w (PMC8761291; doi:10.1186/s12863-021-01022-w)
Supplement: Supplementary file 6 — Additional files 6: Table S3. Subgroup analysis on the correlation of CARM1 expression and prognosis of ovarian cancer cases. [file 12863_2021_1022_MOESM6_ESM.xlsx]

## Sheet: Table 1
Table S3. Subgroup analysis on the correlation of CARM1 expression and prognosis of Ovarian cancer cases.
Factor	Subgroup	Sample size	OS		PFS		PPS
			HR	P	HR	P	HR	P
Histology	Endometrioid	62	0.27	0.15	2.45	0.14	/	/
	Serous	1232	0.85	0.033	0.76	0.00024	0.86	0.099
Stage	1	107	0.78	0.021	1.82	0.26	/	/
	1+2	179	0.45	0.0024	2.14	0.0099	0.65	0.059
	2	72	0.3	0.031	1.82	0.12	0.33	0.039
	2+3	1151	0.85	0.097	0.75	0.00023	0.88	0.17
	2+3+4	1340	0.91	0.27	0.79	0.00065	0.89	0.18
	3	1079	0.86	0.062	0.73	5.7e-05	0.85	0.13
	3+4	1268	0.91	0.23	0.76	0.00018	0.88	0.17
	4	189	1.52	0.025	0.77	0.26	1.35	0.2
TP53 mutation	mutated	516	0.76	0.025	0.64	0.00033	0.78	0.09
	Wild type	102	0.74	0.33	0.58	0.045	0.7	0.27
