# Supplementary material for: Systematic pan-cancer landscape identifies CARM1 as a potential prognostic and immunological biomarker
Source: BMC Genom Data. 2022 Jan 16;23:7. doi: 10.1186/s12863-021-01022-w (PMC8761291; doi:10.1186/s12863-021-01022-w)
Supplement: Supplementary file 7 — Additional files 7: Table S4. Subgroup analysis on the correlation of CARM1 expression and prognosis of lung cancer cases. [file 12863_2021_1022_MOESM7_ESM.xlsx]

## Sheet: Table 1
Table S4. Subgroup analysis on the correlation of CARM1 expression and prognosis of lung cancer cases.
Factor	Subgroup	Sample size	OS		FP		PPS
			HR	P	HR	P	HR	P
Hisology	Adenocarcinoma	865	3.11	5.1*10-12	2.16	3.7*10-5	1.95	0.0066
	Squamous cell carcinoma	675	0.68	0.0018	0.73	0.25	0.24	0.026
Stage	1	652	4.57	1.5*10-12	1.89	0.0039	3.46	0.00043
Grade	Ⅰ	202	0.76	0.14	0.67	0.11	1.69	0.038
AJCC stage T	1	475	0.81	0.19	0.71	0.03	/	/
	2	686	0.82	0.1	0.71	0.03	1.41	0.05
	3	99	1.5	0.15	3.45	0.036	/	/
	4	48	1.43	0.27	/	/	/	/
AJCC stage N	0	863	1.12	0.33	0.8	0.25	1.5	0.063
AJCC stage M	0	818	1.16	0.16	1.54	0.1	2.02	0.028
	1	10	/	/	/	/	/	/
Gender	female	817	1.84	4*10-5	2.29	1.9*10-5	1.68	0.03
	male	1387	1.45	0.00019	1.81	0.00033	1.68	0.0049
Smoking history	Exclude those never smoked	970	1.45	0.0045	1.46	0.011	1.49	0.0066
	Only those never smoked	247	3.95	5.4*10-7	2.59	5.1*10-5	2.79	0.0019
